# Supplementary material for: Dual-phase spinel Li4Ti5O12/anatase TiO2 nanosheet anchored 3D reduced graphene oxide aerogel scaffolds as self-supporting electrodes for high-performance Na- and Li-ion batteries
Source: Royal Society of Chemistry journal article supplement (doi:10.1039/c7ra09343h), 2017-01-01
Supplement: c7ra09343h1.pdf [file c7ra09343h1.pdf]

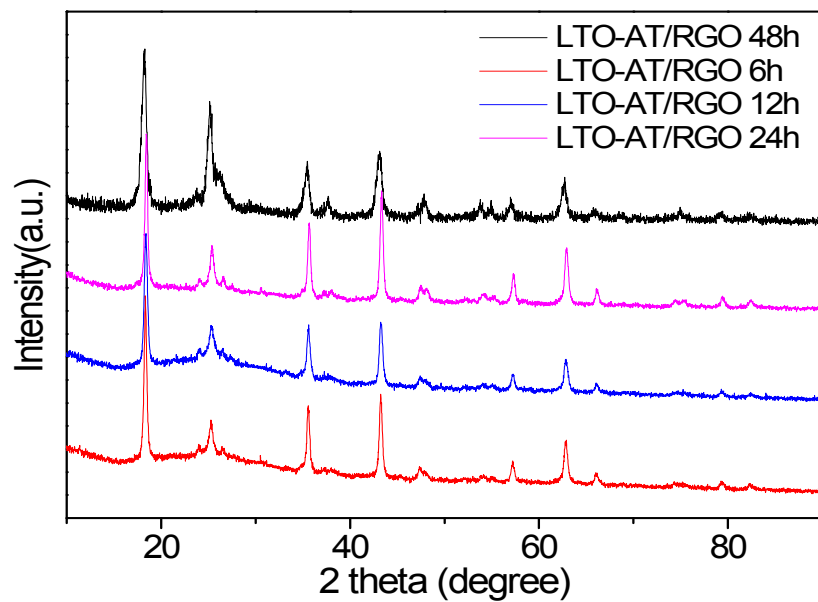

FIG.S1 XRD patterns of the self-supporting LTO-AT/RGO aerogel with different time of the water washing.

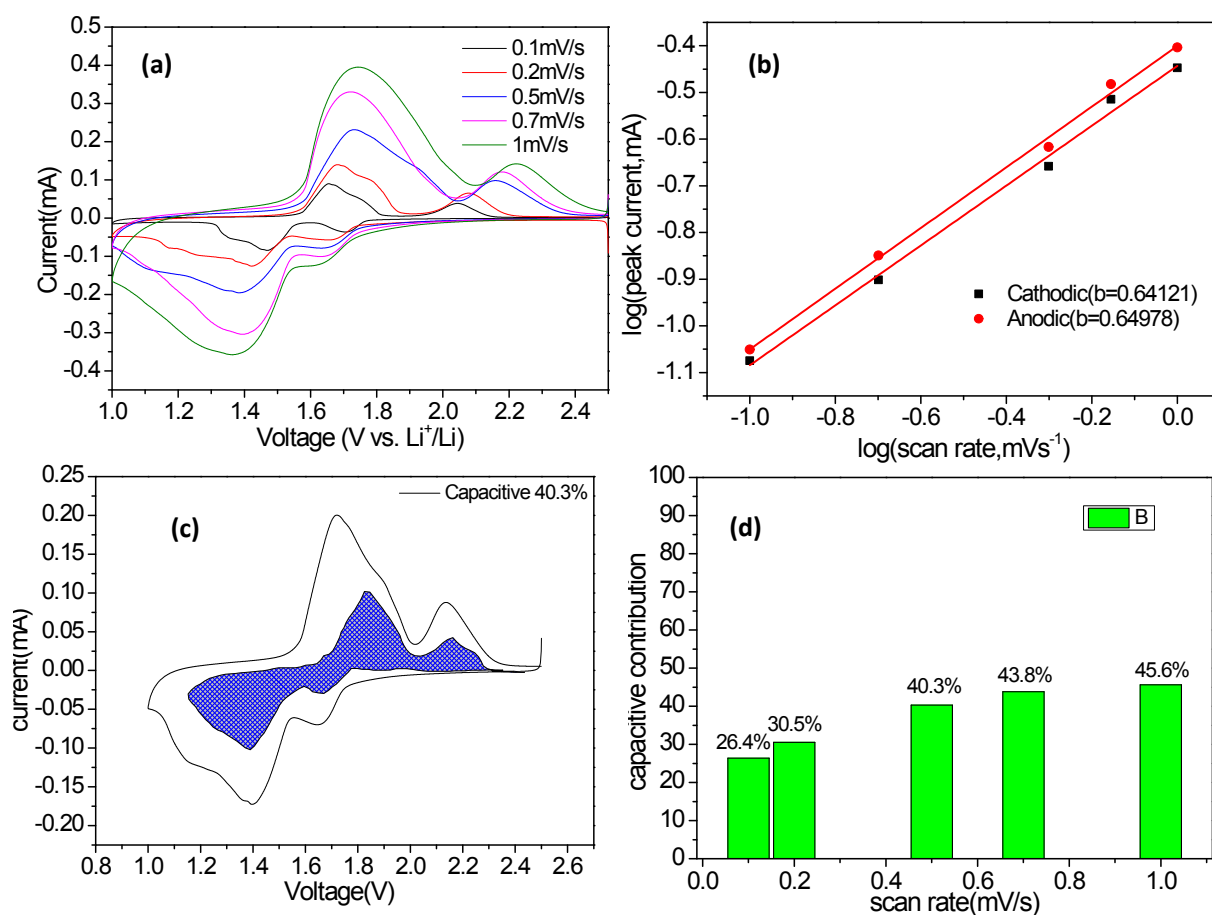

FIG.S2 (a) CV curves at various scan rates of self-supporting LTO-AT/RGO electrode for SIBs; (b) calculating the b-value according to  $\text{Log}(i)$ - $\text{Log}(v)$  plots; (c) Typical CV curve with the contribution from capacitive effect shown by the highlighted region at 0.5  $\text{mV s}^{-1}$ ; (d) Comparison of the capacitive charge contributions at different scan rates.

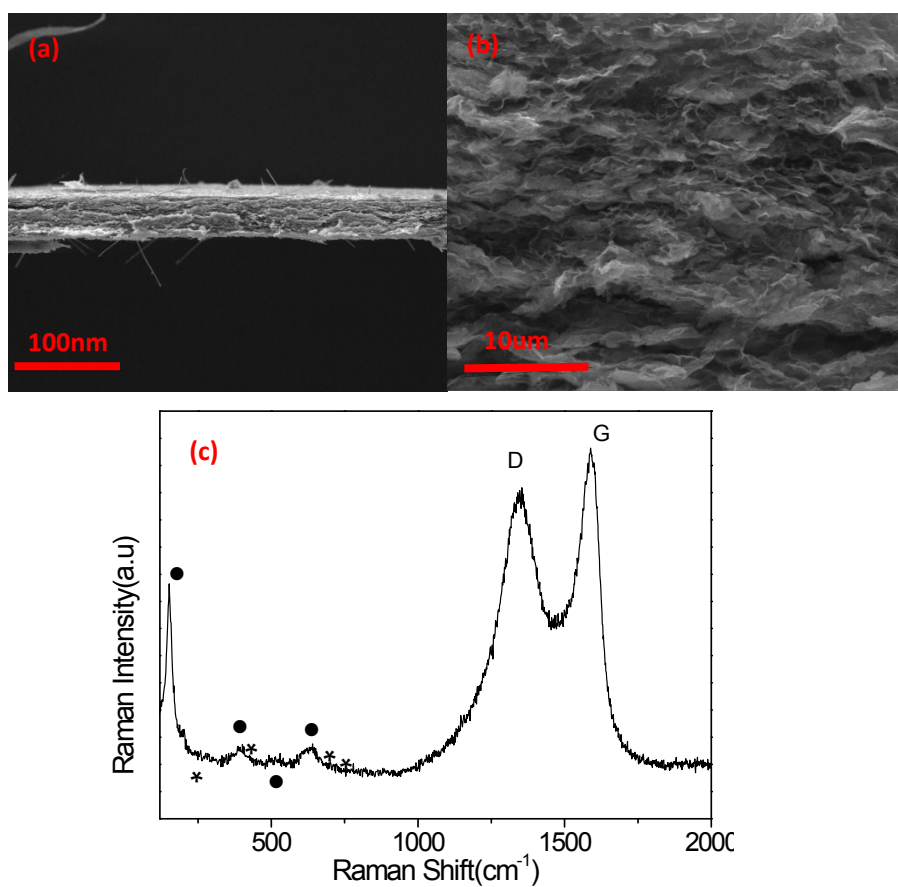

FIG.S3 (a) and (b) SEM image of the as-cycled self-supporting LTO-AT/RGO electrode as lithium ion battery; (c) Raman scattering spectra acquired from the self-supporting LTO-AT/RGO electrode after 1000 cycles.
